# Supplementary material for: Comparison of FTIR transmission and transfection substrates for canine liver cancer detection
Source: Royal Society of Chemistry journal article supplement (doi:10.1039/c4an01901f), 2014-11-28
Supplement: c4an01901f1.pdf [file c4an01901f1.pdf]

## Supplementary

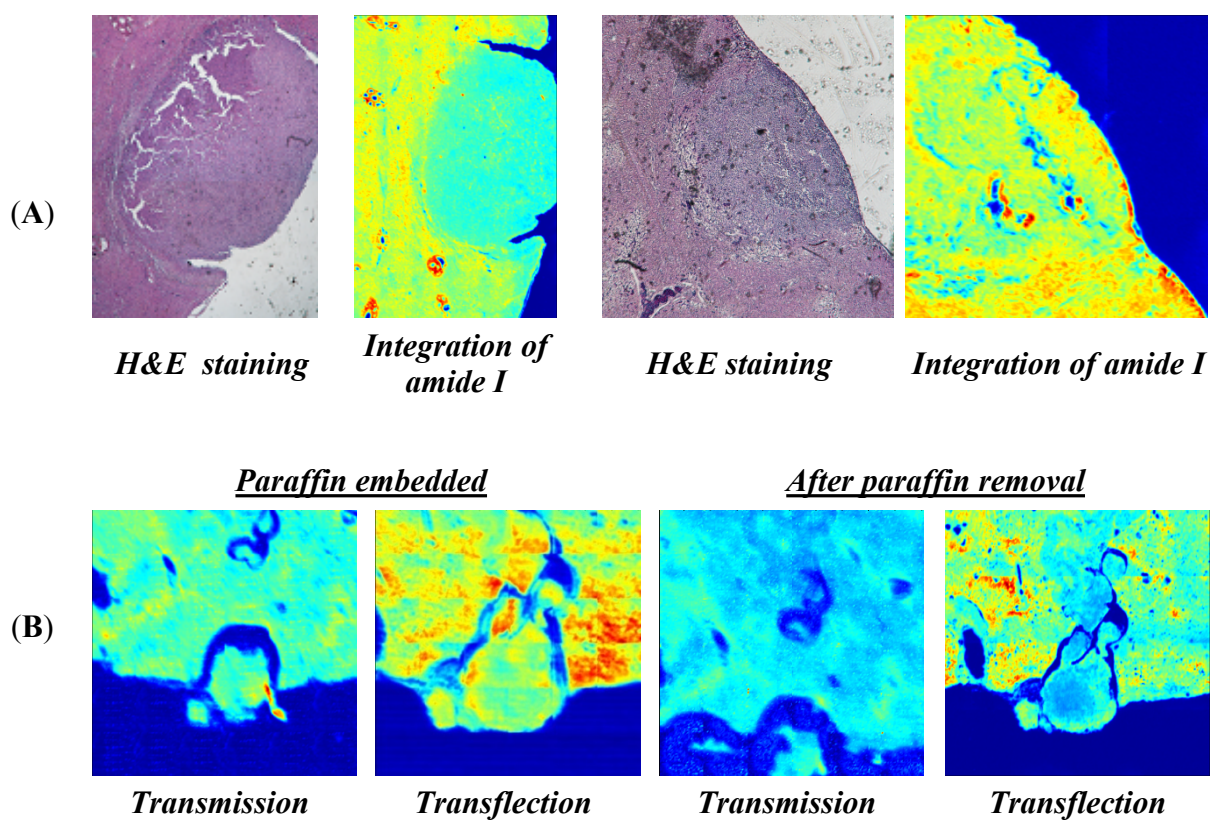

**Fig. S1.**(A) Examples of correlation between measured areas and the results of H&E staining on neighboring sections and (B) an example of correlation between areas measured before and after paraffin removal in transmission and transfection.

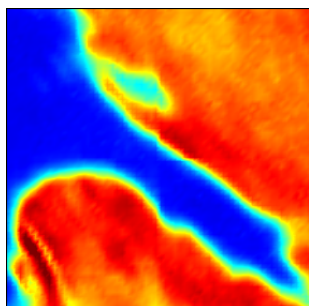

*Integration of amide I  
(1620 – 1680  $\text{cm}^{-1}$ )*

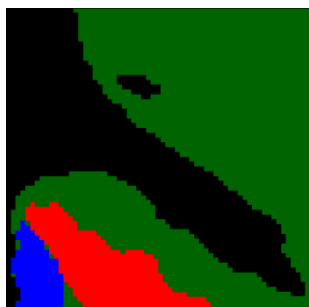

*KMC result:  
distribution of classes*

### *Transmission*

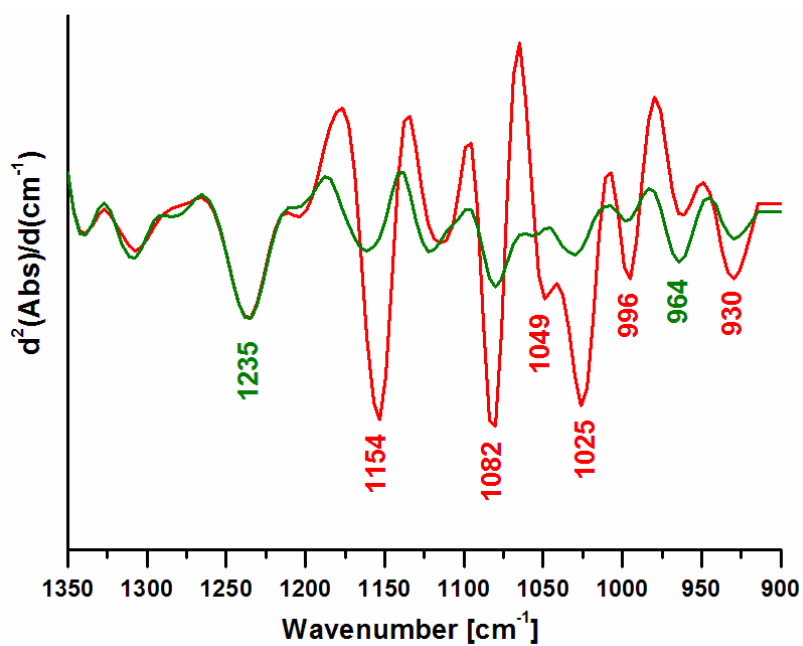

*KMC result: average spectra of the **normal** and **cancerous** classes.*

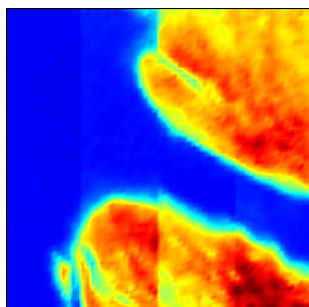

*Integration of amide I  
(1620 – 1680  $\text{cm}^{-1}$ )*

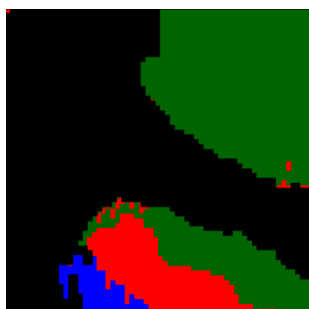

### *Transflection*

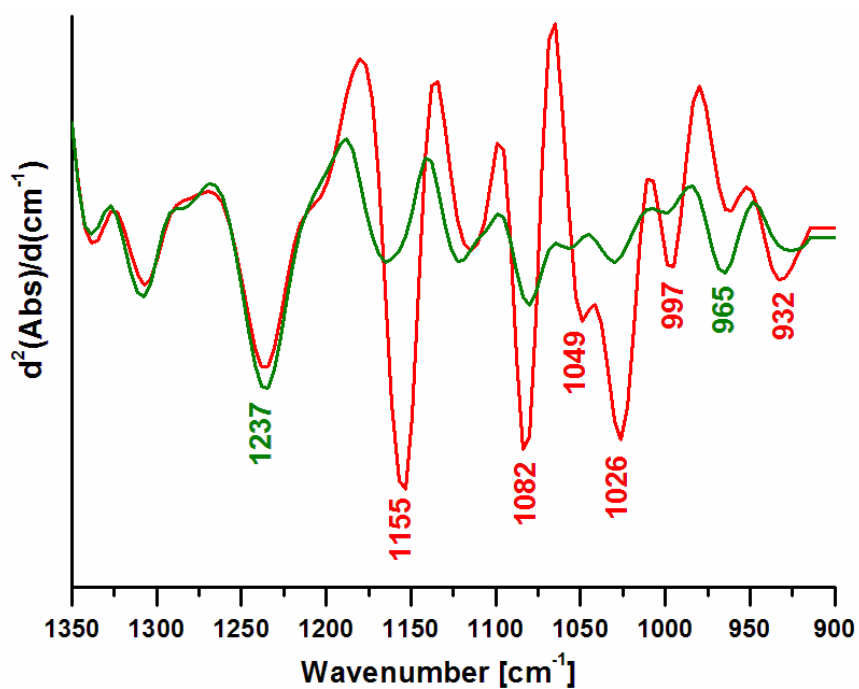

*KMC result:                    KMC result: average spectra of the **normal** and **cancerous** classes.  
distribution of classes*

**Fig. S2.** Examples of correlation between measured areas from the samples prepared on CaF<sub>2</sub> (transmission) and Kevley (transflection) from the same individual: integration of amide I bands along with cluster analysis results (2<sup>nd</sup> derivatives) in the range 1350 – 900 cm<sup>-1</sup>.

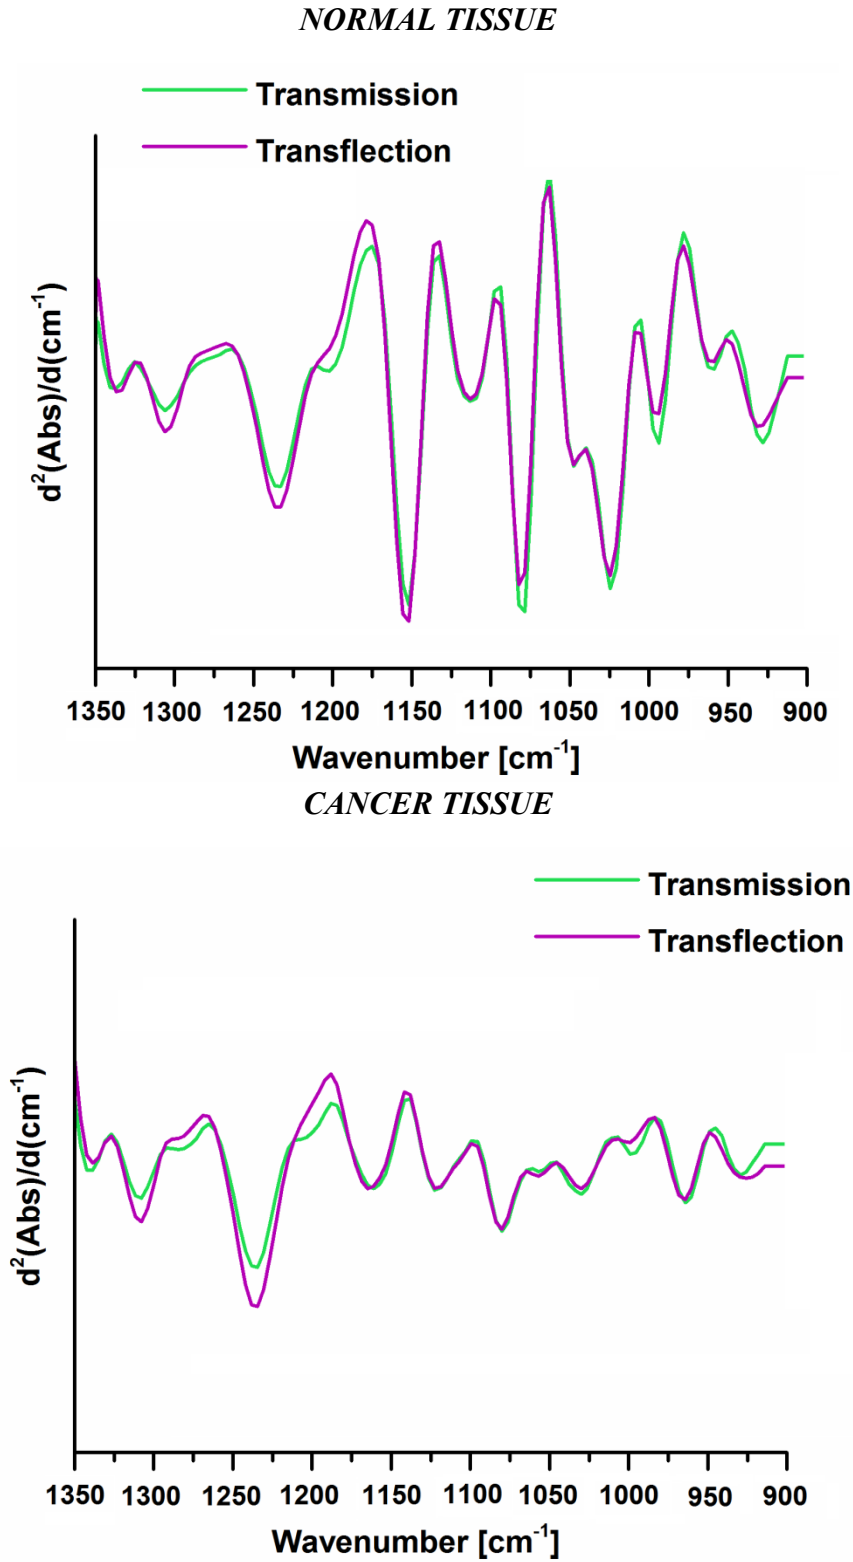

**Fig.3S.** 2<sup>nd</sup> derivatives of spectra corresponding to normal and cancer classes (Fig. 2S) measured in transmission and transflection modes. Despite the differences in the measurement modes, there are only marginal differences normal and tumor affected areas.

(1)

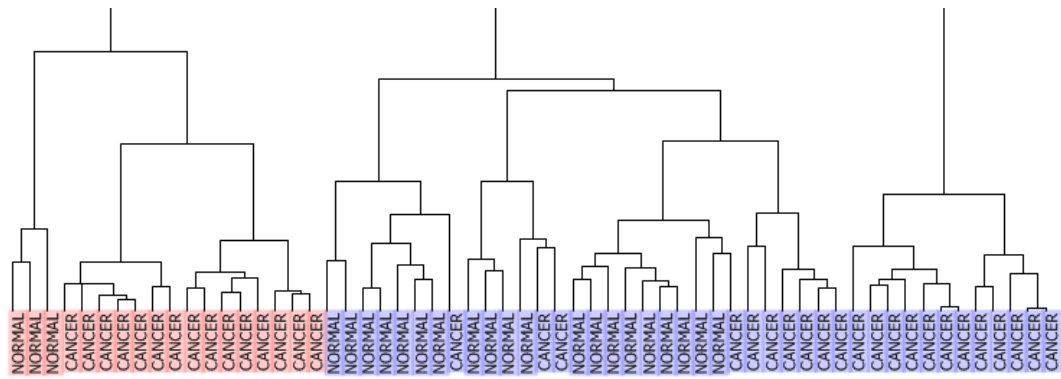

(2)

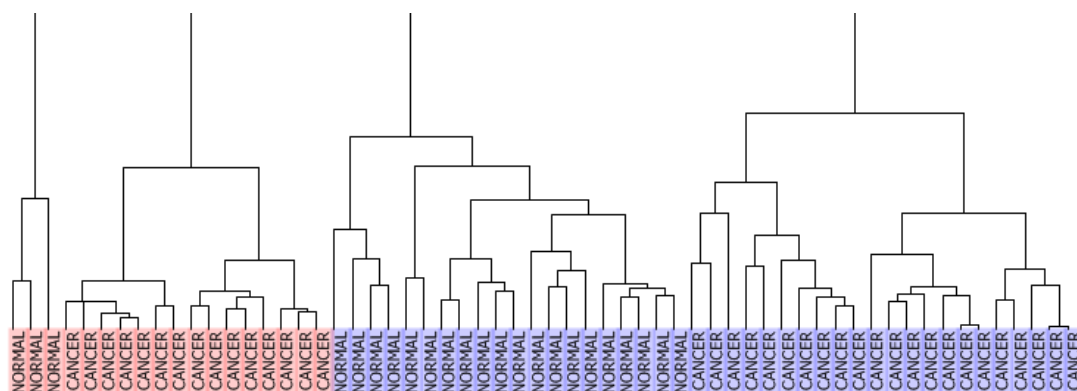

**Fig.4S.** Results of unsupervised hierarchical cluster analysis (UHCA), performed on the set of normal and cancerous spectra measured in transmission mode for paraffin embedded sections, in the ranges: **(1)** 1680 – 1530 cm<sup>-1</sup> and **(2)** 1350 – 900 cm<sup>-1</sup>& 1680 – 1530 cm<sup>-1</sup>. The separation is less accurate than with the use of only the range 1350 – 900 cm<sup>-1</sup> (Fig. 2).



*Transflection set of normal and cancerous spectra from paraffin embedded sections.*

**(1)**

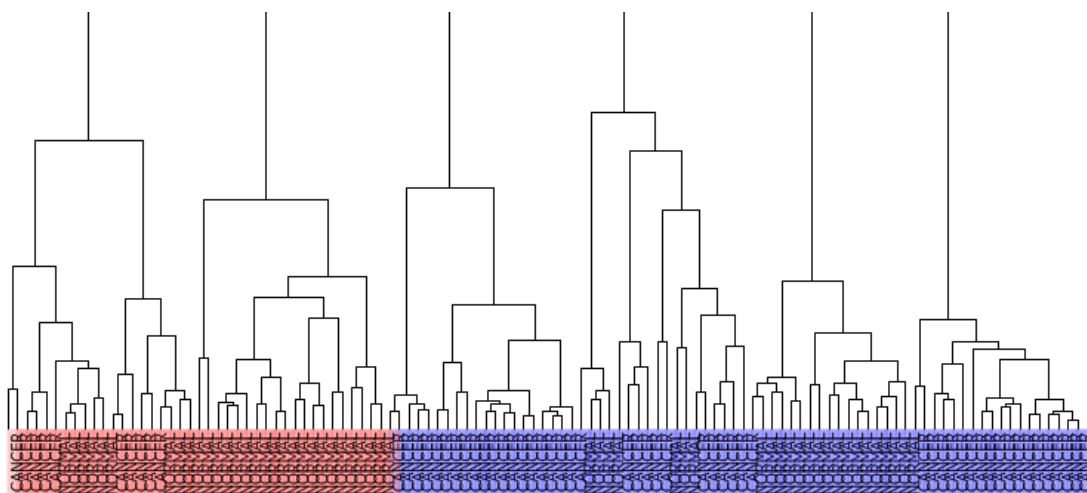

(2)

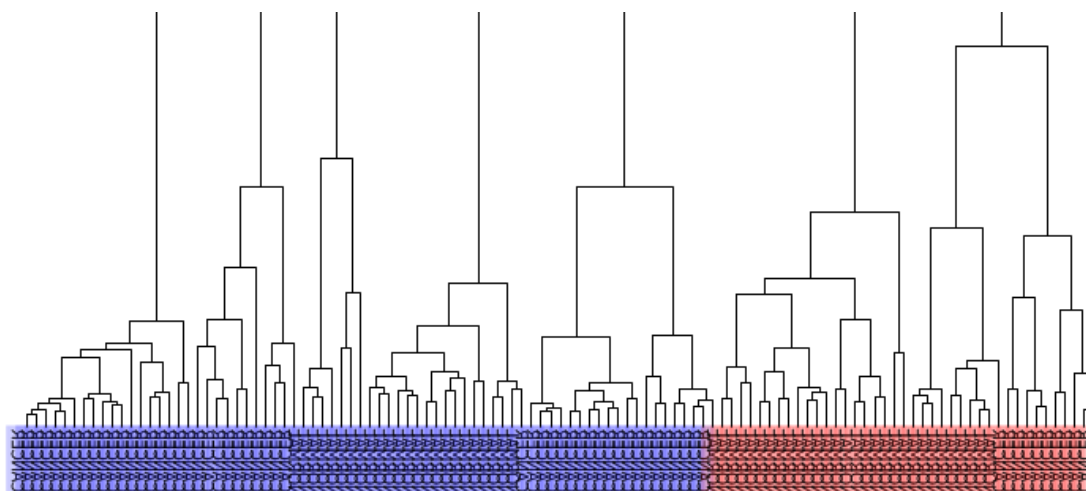

**Fig.5S.**Results of unsupervised hierarchical cluster analysis (UHCA), performed on the set of normal and cancerous spectra measured in transflection mode for paraffin embedded sections, in the ranges: (1)  $1680 - 1530 \text{ cm}^{-1}$  and (2)  $1350 - 900 \text{ cm}^{-1}$  &  $1680 - 1530 \text{ cm}^{-1}$ . The separation is less accurate than with the use of only the range  $1350 - 900 \text{ cm}^{-1}$  (Fig. 2).

***Transmission & transflection set of normal and cancerous spectra from paraffin embedded sections.***

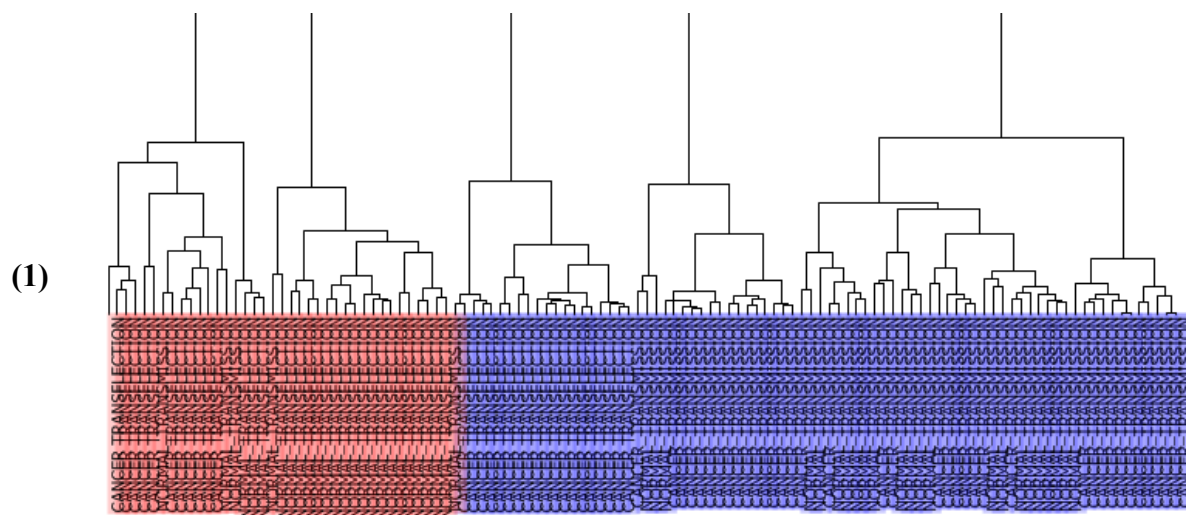

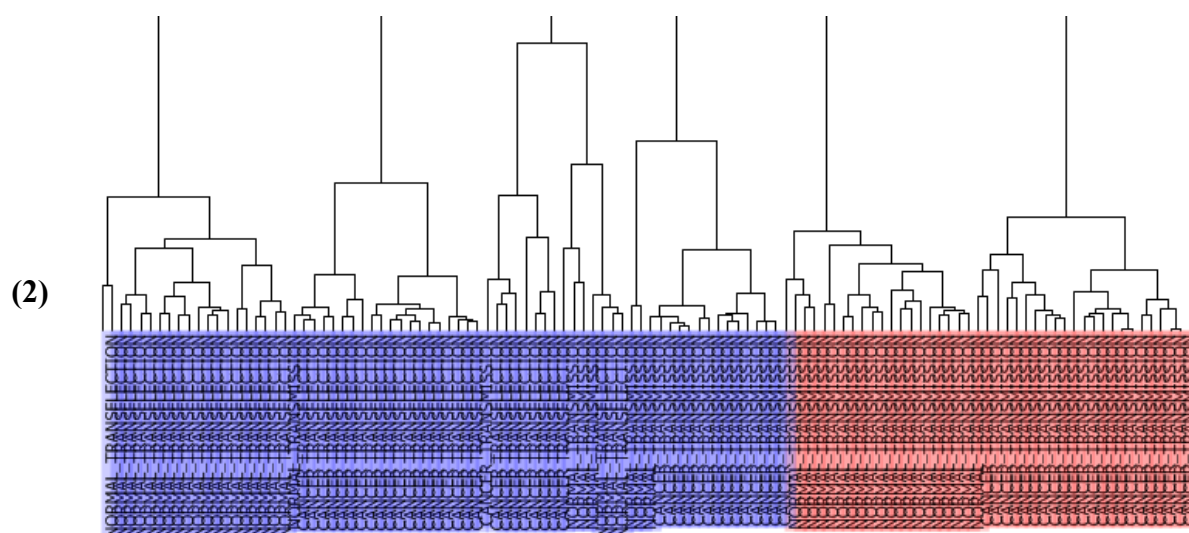

**Fig.6S.**Results of unsupervised hierarchical cluster analysis (UHCA), performed on the set of normal and cancerous spectra measured in transmission and transflection mode for paraffin embedded sections, in the ranges: (1)  $1680 - 1530 \text{ cm}^{-1}$  and (2)  $1350 - 900 \text{ cm}^{-1}$  &  $1680 - 1530 \text{ cm}^{-1}$ . The separation is less accurate than with the use of only the range  $1350 - 900 \text{ cm}^{-1}$  (Fig. 2).

*Paraffin embedded section*

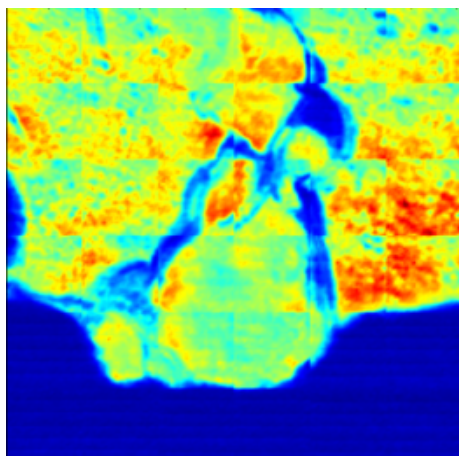

*Integration of amide I (1620 – 1680 cm<sup>-1</sup>)*

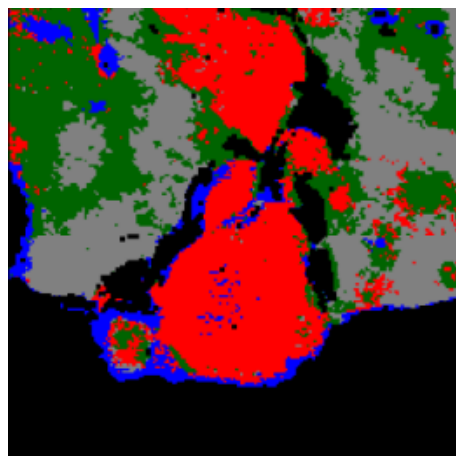

*KMC result: distribution of classes*

**Deparaffined section**

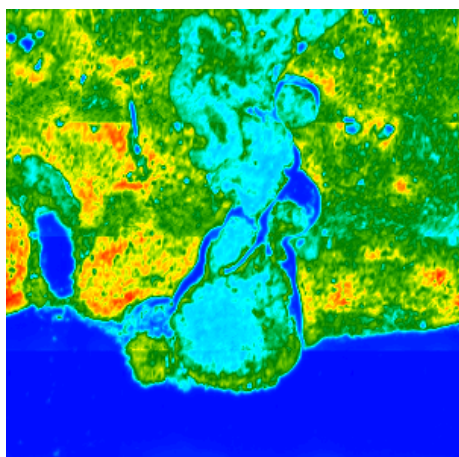

*Integration of amide I (1620 – 1680 cm<sup>-1</sup>)*

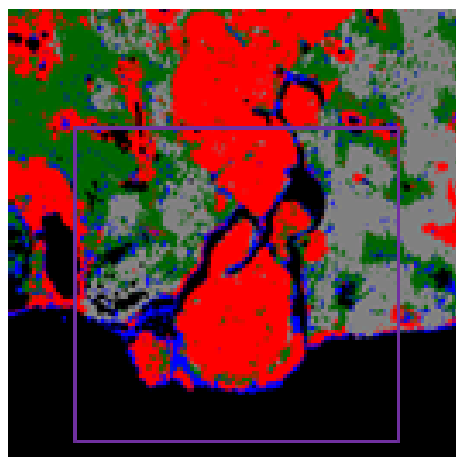

*KMC result: distribution of classes*

**Fig.7S.** Direct comparison of the KMC results (distribution of classes) for areas of the same sample measured before and after removing paraffin. Since the area measured after paraffin removal is bigger, the corresponding part has been marked with purple square. Distribution of the classes is highly similar.

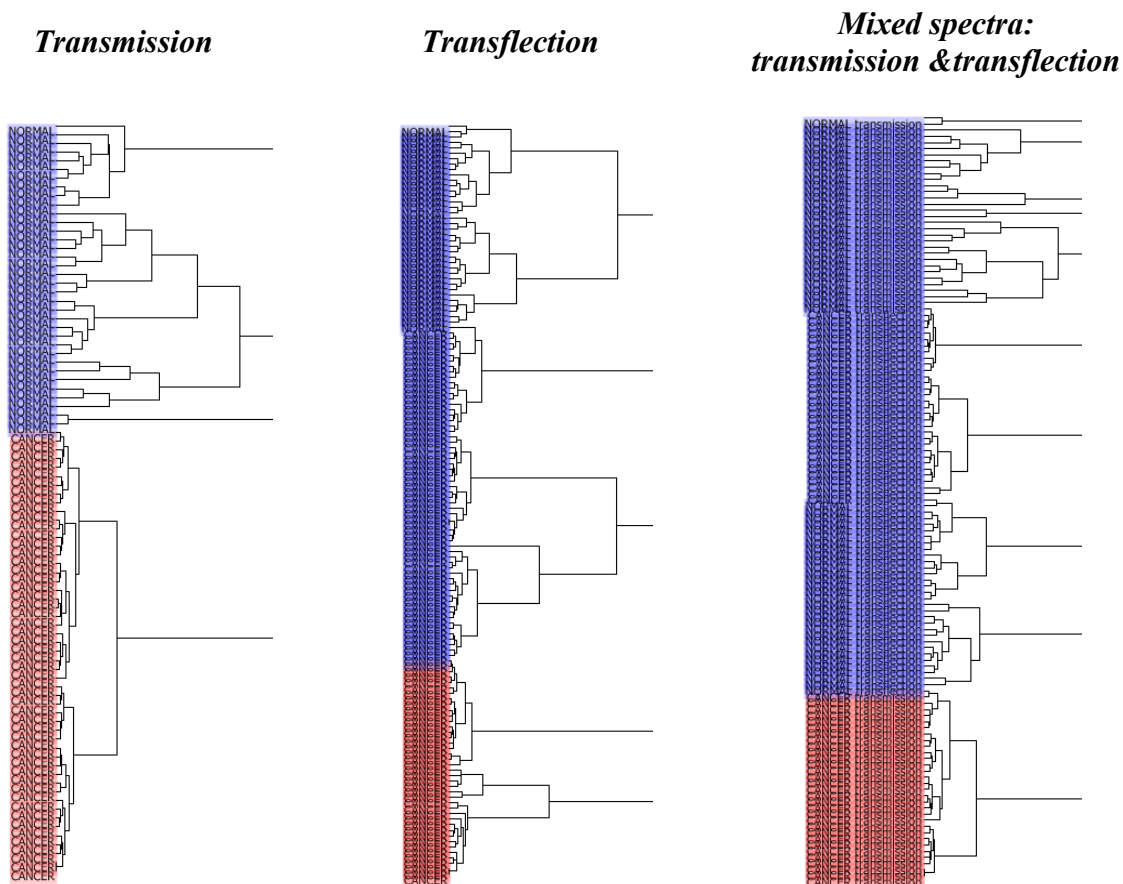

**Fig.8S.** Unsupervised hierarchical cluster analysis (UHCA) in the range  $1700 - 900 \text{ cm}^{-1}$  showing the distinction between normal and cancerous spectra in three data sets: transmission (including normal and cancerous spectra measured in transmission), transflection (including normal and cancerous spectra measured in transflection) and mixed spectra (including normal and cancerous spectra measured in transmission and transflection) after paraffin removal. The separation is less accurate than with the use of only the range  $1350 - 900 \text{ cm}^{-1}$  (Fig. 6) for transflection and mixed spectra data sets. It remains identical for transmission.

### TRANSMISSION

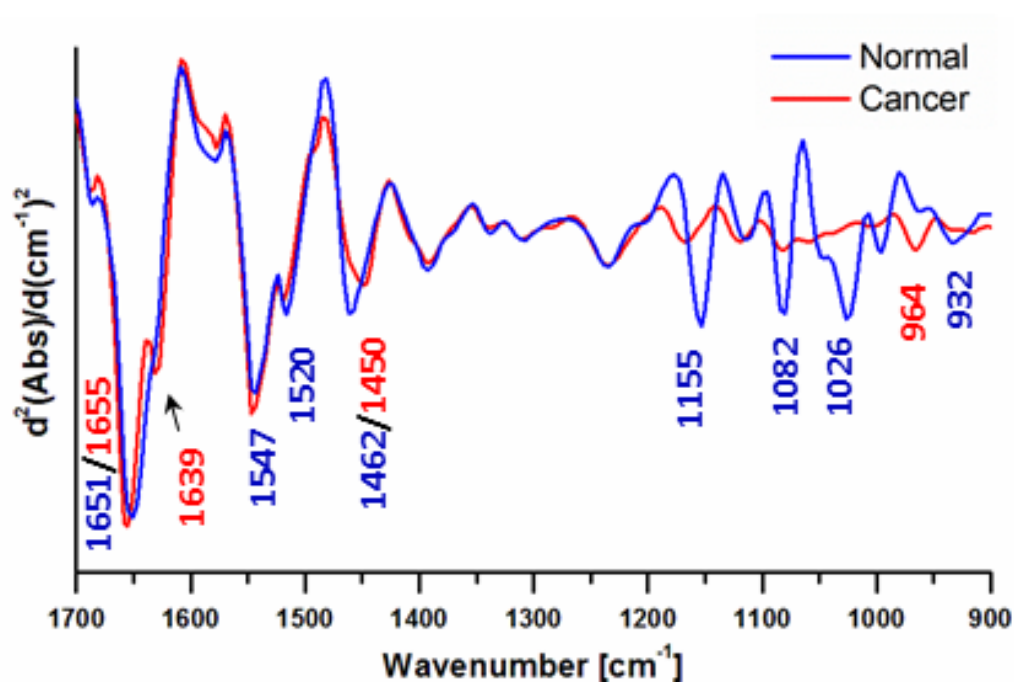

### TRANSFLECTION

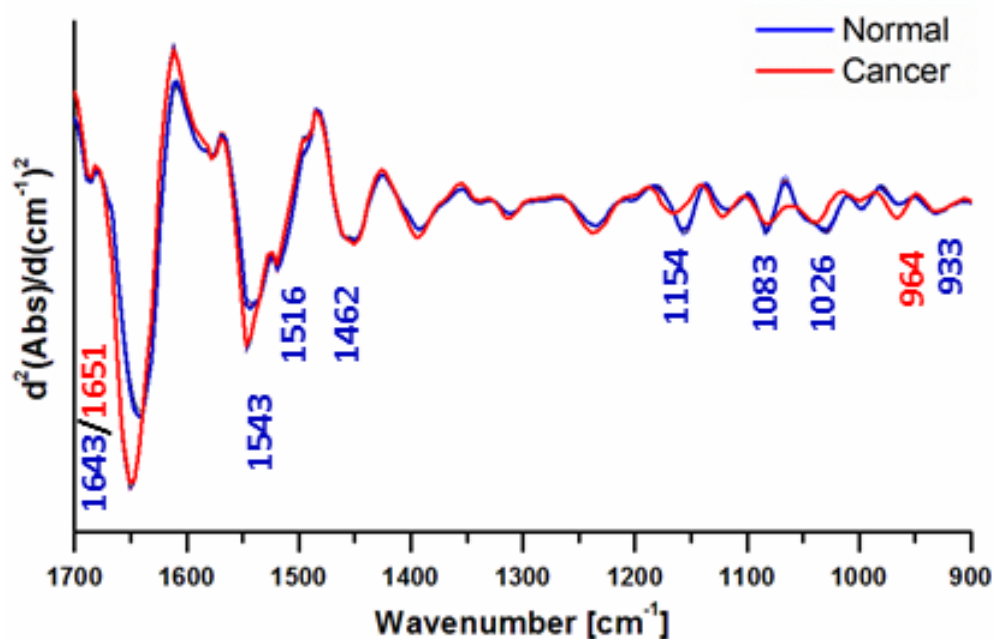

**Fig.9S.** 2<sup>nd</sup> derivatives of spectra corresponding to normal and cancer areas measured in transmission and transflection modes in the range 1700 – 900  $\text{cm}^{-1}$ . Clearly visible difference of band intensities from the range 1400 – 900  $\text{cm}^{-1}$  relative the amide I band. As the differential spectral changes are located in this range, the higher relative intensity of these bands (relative to the amide I) may explain their greater influence on the result of the analysis in the range of 1700 – 900  $\text{cm}^{-1}$  for transmission (Fig. 7S).

3900 – 900  $\text{cm}^{-1}$

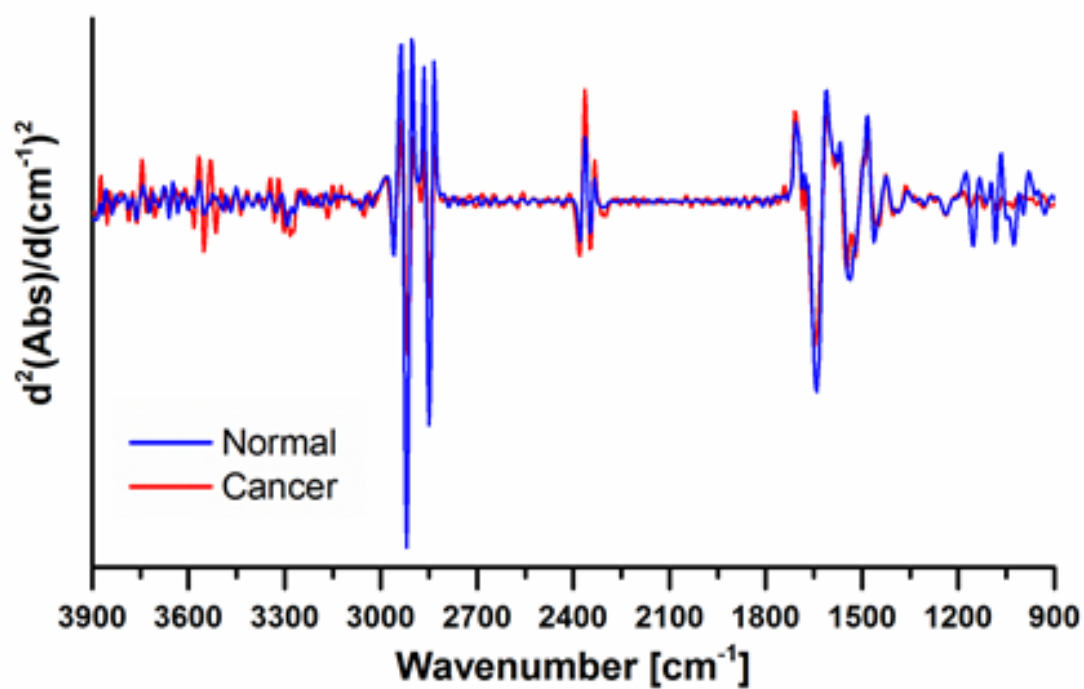

3700 – 3300  $\text{cm}^{-1}$

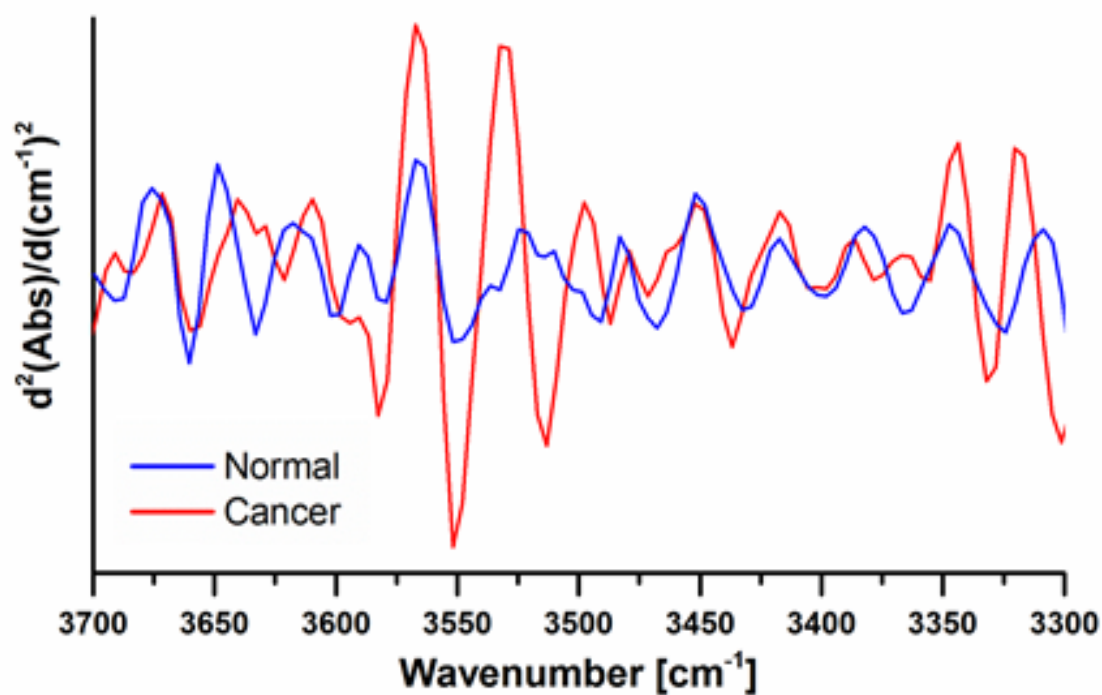

**Fig.10S.** 2<sup>nd</sup> derivatives of spectra corresponding to normal and cancer areas measured in transmission in the range 3900 – 900  $\text{cm}^{-1}$  with highlighted area between 3700 – 3300  $\text{cm}^{-1}$  (showing the O – H stretching mode).
